# Supplementary material for: Effects of Dietary Energy on Growth Performance, Rumen Fermentation and Bacterial Community, and Meat Quality of Holstein-Friesians Bulls Slaughtered at Different Ages
Source: PubMed Central journal article supplement (PMC6941049; doi:10.3390/ani9121123), 2019-12-11
Supplement: animals-09-01123-s001.pdf [file animals-09-01123-s001.pdf]

**Effects of dietary energy on growth performance, rumen fermentation and bacterial community, and meat quality of Holstein-Friesians bulls slaughtered at different ages**

**Table S1.** Relative abundance of ruminal bacteria at the phylum level.

| Item <sup>1</sup>                | LE   |      |      | ME   |      |      | HE   |      |      | SEM   | P-value |       |          |
|----------------------------------|------|------|------|------|------|------|------|------|------|-------|---------|-------|----------|
|                                  | 20   | 23   | 26   | 20   | 23   | 26   | 20   | 23   | 26   |       | Diet    | Age   | Diet×Age |
| <i>p_Bacteroidetes</i>           | 54.1 | 55.9 | 57.1 | 53.3 | 55.2 | 55.3 | 53.4 | 54.8 | 52.4 | 0.812 | 0.623   | 0.718 | 0.946    |
| <i>p_Firmicutes</i>              | 28.5 | 28.2 | 27.7 | 33.5 | 26.5 | 31.1 | 32.9 | 33.0 | 32.5 | 1.022 | 0.210   | 0.648 | 0.792    |
| <i>Firmicutes: Bacteroidetes</i> | 0.54 | 0.53 | 0.49 | 0.64 | 0.48 | 0.56 | 0.62 | 0.61 | 0.65 | 0.027 | 0.321   | 0.646 | 0.867    |
| <i>p_Proteobacteria</i>          | 8.33 | 4.72 | 4.48 | 4.78 | 9.32 | 6.71 | 7.84 | 4.63 | 8.90 | 0.673 | 0.706   | 0.897 | 0.166    |
| <i>p_Fibrobacteres</i>           | 2.47 | 2.57 | 1.92 | 1.92 | 2.20 | 1.53 | 1.98 | 2.05 | 1.15 | 0.177 | 0.412   | 0.242 | 0.996    |
| <i>p_Verrucomicrobia</i>         | 1.24 | 2.03 | 2.48 | 1.03 | 1.76 | 1.16 | 0.51 | 1.07 | 1.74 | 0.167 | 0.105   | 0.071 | 0.610    |
| <i>p_Spirochaetae</i>            | 1.42 | 1.54 | 1.41 | 1.39 | 1.46 | 1.24 | 0.84 | 1.33 | 0.80 | 0.091 | 0.104   | 0.397 | 0.918    |
| <i>p_Tenericutes</i>             | 0.95 | 1.17 | 1.50 | 0.63 | 0.67 | 0.89 | 0.62 | 0.65 | 0.43 | 0.064 | 0.001   | 0.143 | 0.069    |
| <i>p_Saccharibacteria</i>        | 0.77 | 1.20 | 1.19 | 1.23 | 0.86 | 0.58 | 0.35 | 0.54 | 0.35 | 0.084 | 0.003   | 0.640 | 0.153    |
| <i>p_Cyanobacteria</i>           | 0.77 | 0.62 | 0.52 | 0.57 | 0.39 | 0.26 | 0.26 | 0.31 | 0.45 | 0.047 | 0.023   | 0.489 | 0.347    |
| <i>p_SRI_Absconditabacteria</i>  | 0.28 | 0.81 | 0.53 | 0.47 | 0.19 | 0.24 | 0.10 | 0.63 | 0.14 | 0.060 | 0.098   | 0.094 | 0.074    |
| <i>p_Synergistetes</i>           | 0.33 | 0.31 | 0.16 | 0.25 | 0.37 | 0.38 | 0.25 | 0.30 | 0.22 | 0.026 | 0.443   | 0.591 | 0.478    |
| <i>p_Actinobacteria</i>          | 0.21 | 0.17 | 0.17 | 0.37 | 0.49 | 0.21 | 0.61 | 0.12 | 0.21 | 0.045 | 0.236   | 0.150 | 0.159    |
| <i>p_Lentisphaerae</i>           | 0.34 | 0.39 | 0.52 | 0.18 | 0.32 | 0.18 | 0.07 | 0.21 | 0.33 | 0.038 | 0.038   | 0.223 | 0.600    |
| <i>p_Elusimicrobia</i>           | 0.22 | 0.35 | 0.27 | 0.25 | 0.15 | 0.15 | 0.15 | 0.31 | 0.21 | 0.030 | 0.441   | 0.639 | 0.704    |

<sup>1</sup>LE: low energy; ME: medium energy; HE: high energy. 20, 23 and 26 represent bulls slaughtered at 20, 23 and 26 months of age, respectively.

**Table S2.** Relative abundance of ruminal bacteria at the genus level.

| Item <sup>1</sup>                            | LE   |      |      | ME   |      |      | HE   |      |      | SEM   | P-value |       |          |
|----------------------------------------------|------|------|------|------|------|------|------|------|------|-------|---------|-------|----------|
|                                              | 20   | 23   | 26   | 20   | 23   | 26   | 20   | 23   | 26   |       | Diet    | Age   | Diet×Age |
| <i>g_Prevotella_1</i>                        | 24.9 | 24.1 | 25.6 | 25.1 | 30.0 | 23.4 | 25.5 | 25.8 | 27.3 | 0.999 | 0.860   | 0.838 | 0.702    |
| <i>g_Unidentified</i>                        | 26.5 | 29.9 | 30.4 | 24.0 | 22.4 | 24.0 | 22.0 | 25.3 | 24.0 | 0.764 | 0.004   | 0.438 | 0.679    |
| <i>g_Succiniclasticum</i>                    | 3.38 | 4.28 | 2.98 | 4.89 | 4.85 | 4.13 | 6.66 | 6.09 | 5.17 | 0.349 | 0.022   | 0.428 | 0.958    |
| <i>g_Rikenellaceae_RC9_gut_group</i>         | 5.49 | 4.69 | 4.92 | 3.79 | 3.17 | 4.32 | 2.32 | 4.17 | 3.46 | 0.210 | 0.001   | 0.659 | 0.054    |
| <i>g_Succinivibrionaceae_UCG-002</i>         | 3.35 | 1.82 | 1.63 | 2.51 | 4.35 | 4.05 | 5.09 | 2.58 | 4.88 | 0.462 | 0.248   | 0.796 | 0.513    |
| <i>g_Prevotellaceae_UCG-001</i>              | 2.67 | 2.57 | 2.81 | 2.20 | 1.90 | 3.63 | 3.46 | 2.70 | 1.67 | 0.199 | 0.975   | 0.688 | 0.083    |
| <i>g_Christensenellaceae_R-7_group</i>       | 2.24 | 2.45 | 2.44 | 2.70 | 1.89 | 2.85 | 2.50 | 1.86 | 2.03 | 0.136 | 0.586   | 0.424 | 0.625    |
| <i>g_Ruminococcus_2</i>                      | 2.10 | 1.18 | 1.15 | 4.02 | 2.38 | 2.63 | 2.32 | 1.29 | 2.28 | 0.271 | 0.067   | 0.184 | 0.913    |
| <i>g_Prevotellaceae_UCG-003</i>              | 2.15 | 1.89 | 2.23 | 2.49 | 1.92 | 3.22 | 1.60 | 2.18 | 1.40 | 0.126 | 0.016   | 0.533 | 0.054    |
| <i>g_Fibrobacter</i>                         | 2.47 | 2.56 | 1.91 | 1.92 | 2.19 | 1.52 | 1.98 | 2.05 | 1.14 | 0.177 | 0.417   | 0.239 | 0.996    |
| <i>g_Ruminococcaceae_NK4A214_group</i>       | 1.56 | 2.24 | 2.27 | 1.68 | 1.28 | 2.19 | 1.70 | 2.09 | 1.63 | 0.127 | 0.624   | 0.486 | 0.395    |
| <i>g_Ruminobacter</i>                        | 2.88 | 1.26 | 0.74 | 0.77 | 3.42 | 1.35 | 1.43 | 0.76 | 2.36 | 0.297 | 0.895   | 0.896 | 0.063    |
| <i>g_Prevotellaceae_UCG-004</i>              | 0.92 | 0.84 | 0.74 | 1.88 | 1.86 | 1.97 | 2.22 | 1.65 | 1.22 | 0.182 | 0.052   | 0.711 | 0.894    |
| <i>g_Ruminococcaceae_UCG-014</i>             | 1.84 | 1.44 | 1.66 | 1.63 | 1.39 | 1.45 | 0.99 | 1.48 | 0.74 | 0.121 | 0.158   | 0.787 | 0.665    |
| <i>g_Treponema_2</i>                         | 1.33 | 1.45 | 1.32 | 1.31 | 1.39 | 1.18 | 0.79 | 1.25 | 0.71 | 0.088 | 0.104   | 0.382 | 0.922    |
| <i>g_Prevotellaceae_NK3B31_group</i>         | 0.96 | 1.32 | 0.78 | 0.94 | 0.81 | 1.48 | 1.24 | 1.15 | 0.49 | 0.103 | 0.895   | 0.773 | 0.151    |
| <i>g_Ruminococcus_1</i>                      | 0.84 | 1.11 | 0.96 | 1.18 | 0.87 | 0.87 | 1.10 | 0.91 | 0.80 | 0.058 | 0.959   | 0.546 | 0.540    |
| <i>g_Eubacterium_coprostanoligenes_group</i> | 0.71 | 0.70 | 0.83 | 0.95 | 0.76 | 0.83 | 0.80 | 1.27 | 1.00 | 0.050 | 0.067   | 0.737 | 0.199    |
| <i>g_Candidatus_Saccharimonas</i>            | 0.76 | 1.20 | 1.19 | 1.23 | 0.86 | 0.58 | 0.35 | 0.54 | 0.35 | 0.084 | 0.003   | 0.640 | 0.156    |
| <i>g_Phocaeicola</i>                         | 0.86 | 0.67 | 0.62 | 0.68 | 0.66 | 0.96 | 0.88 | 0.80 | 0.43 | 0.047 | 0.827   | 0.449 | 0.067    |
| <i>g_Lachnospiraceae_NK3A20_group</i>        | 0.62 | 0.47 | 0.51 | 1.09 | 0.60 | 0.52 | 1.22 | 0.70 | 0.63 | 0.062 | 0.058   | 0.004 | 0.517    |
| <i>g_Lachnospiraceae_ND3007_group</i>        | 0.49 | 0.79 | 1.01 | 0.29 | 0.43 | 0.94 | 0.97 | 0.49 | 0.93 | 0.063 | 0.130   | 0.006 | 0.076    |
| <i>g_Saccharofermentans</i>                  | 0.70 | 0.61 | 0.83 | 0.92 | 0.65 | 0.71 | 0.67 | 0.42 | 0.70 | 0.039 | 0.201   | 0.056 | 0.585    |
| <i>g_Moryella</i>                            | 0.46 | 0.47 | 0.49 | 0.68 | 0.54 | 0.73 | 0.96 | 0.66 | 0.65 | 0.044 | 0.029   | 0.365 | 0.522    |
| <i>g_Ruminococcaceae_UCG-001</i>             | 0.10 | 0.10 | 0.02 | 0.10 | 0.14 | 0.04 | 0.29 | 0.15 | 4.42 | 0.480 | 0.336   | 0.431 | 0.435    |

|                                        |      |      |      |      |      |      |      |      |      |       |       |       |       |
|----------------------------------------|------|------|------|------|------|------|------|------|------|-------|-------|-------|-------|
| <i>g_Ruminococcaceae_UCG-005</i>       | 0.45 | 0.60 | 0.55 | 0.60 | 0.52 | 0.53 | 0.60 | 1.04 | 0.45 | 0.054 | 0.409 | 0.245 | 0.303 |
| <i>g_Ruminococcaceae_UCG-010</i>       | 0.53 | 0.76 | 0.86 | 0.50 | 0.55 | 0.75 | 0.26 | 0.54 | 0.57 | 0.042 | 0.017 | 0.006 | 0.830 |
| <i>g_Papillibacter</i>                 | 0.53 | 0.54 | 0.68 | 0.44 | 0.57 | 0.88 | 0.43 | 0.47 | 0.46 | 0.041 | 0.166 | 0.097 | 0.460 |
| <i>g_Veillonellaceae_UCG-001</i>       | 0.42 | 0.32 | 0.39 | 0.40 | 0.53 | 0.48 | 0.49 | 0.56 | 0.52 | 0.031 | 0.178 | 0.893 | 0.792 |
| <i>g_Erysipelotrichaceae_UCG-004</i>   | 0.31 | 0.30 | 0.44 | 0.20 | 0.33 | 0.35 | 0.40 | 0.99 | 0.50 | 0.089 | 0.305 | 0.582 | 0.761 |
| <i>g_Eubacterium_ruminantium_group</i> | 0.30 | 0.32 | 0.32 | 0.60 | 0.33 | 0.46 | 0.59 | 0.37 | 0.35 | 0.036 | 0.190 | 0.175 | 0.573 |
| <i>g_Butyrvibrio_2</i>                 | 0.36 | 0.39 | 0.39 | 0.28 | 0.31 | 0.43 | 0.46 | 0.40 | 0.32 | 0.025 | 0.726 | 0.967 | 0.491 |
| <i>g_Pseudobutyrvibrio</i>             | 0.32 | 0.42 | 0.49 | 0.32 | 0.32 | 0.32 | 0.40 | 0.38 | 0.31 | 0.032 | 0.565 | 0.937 | 0.782 |
| <i>g_Lachnospiraceae_XPB1014_group</i> | 0.32 | 0.27 | 0.35 | 0.47 | 0.40 | 0.34 | 0.33 | 0.23 | 0.37 | 0.028 | 0.348 | 0.560 | 0.774 |
| <i>g_Lachnospiraceae_AC2044_group</i>  | 0.37 | 0.38 | 0.35 | 0.37 | 0.24 | 0.21 | 0.19 | 0.18 | 0.20 | 0.021 | 0.001 | 0.422 | 0.416 |
| <i>g_Anaeroplasm</i>                   | 0.25 | 0.35 | 0.36 | 0.20 | 0.23 | 0.34 | 0.22 | 0.27 | 0.19 | 0.018 | 0.090 | 0.157 | 0.313 |
| <i>g_Pyramidobacter</i>                | 0.30 | 0.29 | 0.14 | 0.21 | 0.35 | 0.36 | 0.23 | 0.26 | 0.19 | 0.026 | 0.451 | 0.536 | 0.438 |
| <i>g_Anaerovorax</i>                   | 0.22 | 0.23 | 0.24 | 0.28 | 0.20 | 0.34 | 0.29 | 0.25 | 0.20 | 0.015 | 0.428 | 0.495 | 0.206 |
| <i>g_Acetitomaculum</i>                | 0.19 | 0.17 | 0.14 | 0.38 | 0.21 | 0.17 | 0.45 | 0.19 | 0.30 | 0.023 | 0.008 | 0.003 | 0.193 |
| <i>g_Ruminococcaceae_UCG-002</i>       | 0.10 | 0.15 | 0.05 | 0.26 | 0.14 | 0.04 | 0.10 | 0.68 | 0.52 | 0.065 | 0.065 | 0.520 | 0.316 |
| <i>g_Anaerotruncus</i>                 | 0.14 | 0.21 | 0.26 | 0.22 | 0.17 | 0.32 | 0.22 | 0.21 | 0.19 | 0.015 | 0.560 | 0.148 | 0.199 |
| <i>g_Elusimicrobium</i>                | 0.19 | 0.31 | 0.21 | 0.20 | 0.11 | 0.09 | 0.10 | 0.28 | 0.15 | 0.028 | 0.358 | 0.450 | 0.627 |
| <i>g_Eubacterium_ventriosum_group</i>  | 0.12 | 0.09 | 0.10 | 0.29 | 0.09 | 0.39 | 0.26 | 0.11 | 0.05 | 0.029 | 0.046 | 0.130 | 0.109 |
| <i>g_Ruminococcaceae_V9D2013_group</i> | 0.17 | 0.22 | 0.16 | 0.21 | 0.03 | 0.22 | 0.04 | 0.26 | 0.03 | 0.028 | 0.585 | 0.834 | 0.103 |
| <i>g_Ruminiclostridium_9</i>           | 0.12 | 0.23 | 0.08 | 0.29 | 0.05 | 0.19 | 0.08 | 0.17 | 0.14 | 0.039 | 0.893 | 0.970 | 0.590 |
| <i>g_Succinimonas</i>                  | 0.26 | 0.18 | 0.09 | 0.12 | 0.24 | 0.13 | 0.08 | 0.07 | 0.16 | 0.021 | 0.308 | 0.757 | 0.188 |
| <i>g_Uncultured</i>                    | 0.24 | 0.05 | 0.05 | 0.56 | 0.04 | 0.07 | 0.05 | 0.12 | 0.13 | 0.053 | 0.565 | 0.181 | 0.336 |
| <i>g_Probable_genus_10</i>             | 0.22 | 0.16 | 0.13 | 0.09 | 0.13 | 0.10 | 0.13 | 0.23 | 0.08 | 0.021 | 0.478 | 0.404 | 0.722 |
| <i>g_Desulfovibrio</i>                 | 0.15 | 0.10 | 0.16 | 0.15 | 0.11 | 0.17 | 0.18 | 0.10 | 0.15 | 0.009 | 0.934 | 0.018 | 0.909 |
| <i>g_Bifidobacterium</i>               | 0.05 | 0.04 | 0.09 | 0.15 | 0.22 | 0.11 | 0.40 | 0.02 | 0.15 | 0.033 | 0.214 | 0.333 | 0.147 |
| <i>g_Ruminococcaceae_UCG-013</i>       | 0.07 | 0.09 | 0.11 | 0.17 | 0.15 | 0.08 | 0.09 | 0.25 | 0.19 | 0.022 | 0.291 | 0.642 | 0.573 |
| <i>g_Marvinbryantia</i>                | 0.12 | 0.10 | 0.08 | 0.14 | 0.05 | 0.24 | 0.12 | 0.19 | 0.15 | 0.022 | 0.609 | 0.741 | 0.469 |
| <i>g_Clostridium_sensu_stricto_1</i>   | 0.13 | 0.08 | 0.04 | 0.05 | 0.08 | 0.02 | 0.08 | 0.36 | 0.17 | 0.040 | 0.283 | 0.598 | 0.723 |
| <i>g_Selenomonas_1</i>                 | 0.07 | 0.03 | 0.04 | 0.06 | 0.10 | 0.05 | 0.33 | 0.13 | 0.20 | 0.031 | 0.045 | 0.616 | 0.762 |

|                                       |      |      |      |      |      |      |      |      |      |       |       |       |       |
|---------------------------------------|------|------|------|------|------|------|------|------|------|-------|-------|-------|-------|
| <i>g_Lachnospirillum_10</i>           | 0.23 | 0.17 | 0.18 | 0.08 | 0.09 | 0.11 | 0.03 | 0.05 | 0.03 | 0.016 | 0.000 | 0.942 | 0.791 |
| <i>g_Prevotellaceae_YAB2003_group</i> | 0.14 | 0.11 | 0.10 | 0.06 | 0.13 | 0.07 | 0.18 | 0.12 | 0.06 | 0.018 | 0.684 | 0.533 | 0.724 |
| <i>g_Oribacterium</i>                 | 0.10 | 0.07 | 0.10 | 0.10 | 0.09 | 0.14 | 0.17 | 0.12 | 0.08 | 0.008 | 0.134 | 0.166 | 0.031 |
| <i>g_Lachnospirillum_1</i>            | 0.03 | 0.03 | 0.04 | 0.08 | 0.08 | 0.08 | 0.33 | 0.15 | 0.10 | 0.020 | 0.000 | 0.115 | 0.049 |

<sup>1</sup>LE: low energy; ME: medium energy; HE: high energy. 20, 23 and 26 represent bulls slaughtered at 20, 23 and 26 months of age, respectively.
